# Supplementary material
Source: HighWire-hosted journal article supplement (https://erj.ersjournals.com/content/60/1/2101499)
Supplement: inline-supplementary-material-1 [file inline-supplementary-material-1.pdf]

# ERS/ATS Technical Standard on Interpretive Strategies for Routine Lung Function Tests

## Executive Summary

Sanja Stanojevic<sup>1</sup>, David A Kaminsky<sup>2</sup>, Martin Miller<sup>3</sup>, Bruce Thompson<sup>4</sup>, Andrea Aliverti<sup>5</sup>, Igor Barjaktarevic<sup>6</sup>, Brendan Cooper<sup>7</sup>, Bruce Culver<sup>8</sup>, Eric Derom<sup>9</sup>, Graham L. Hall<sup>10</sup>, Teal S. Hallstrand<sup>8</sup>, Joerg D. Leuppi<sup>11</sup>, Neil MacIntyre<sup>12</sup>, Meredith McCormack<sup>13</sup>, Margaret Rosenfeld<sup>14</sup>, Erik R Swenson<sup>8,15</sup>

1. Department of Community Health and Epidemiology, Dalhousie University, Halifax, Nova Scotia, Canada
2. Pulmonary Disease and Critical Care Medicine, University of Vermont Larner College of Medicine, Burlington, VT, U.S.A.
3. Institute of Applied Health Research, University of Birmingham, Birmingham, UK.
4. Physiology Service, Department of Respiratory Medicine, The Alfred Hospital and School of Health Sciences, Swinburne University of Technology, Melbourne, Australia
5. Department Electronics, Information and Bioengineering (DEIB), Politecnico di Milano, Milan, Italy
6. Division of Pulmonary and Critical Care Medicine, University of California, Los Angeles, CA, USA
7. Lung Function & Sleep Department, Queen Elizabeth Hospital; University Hospitals Birmingham NHSFT, Birmingham, UK
8. Department of Medicine, Division of Pulmonary, Critical Care and Sleep Medicine, University of Washington, Seattle, WA, U.S.A.
9. Department of Respiratory Medicine, Ghent University, Ghent, Belgium
10. Children's Lung Health, Wal-yan Respiratory Research Centre, Telethon Kids Institute and School of Allied Health, Faculty of Health Science, Curtin University, Bentley, Perth, Australia
11. University Clinic of Medicine, Cantonal Hospital Basel and, Liestal; and University of Basel, Basel, Switzerland
12. Duke University, Durham, NC, U.S.A.
13. Pulmonary Function Laboratory, Pulmonary and Critical Care Medicine, Johns Hopkins University, Baltimore, MD, U.S.A.
14. Seattle Children's Hospital, Seattle, WA, U.S.A.
15. VA Puget Sound Health Care System, Seattle, WA, U.S.A.

Corresponding Author: Sanja Stanojevic, Dalhousie University, [sanja.stanojevic@dal.ca](mailto:sanja.stanojevic@dal.ca)

Keywords; pulmonary function; interpretation; spirometry; reference equations

Word count: 3335

## Table of Contents

|                                                                                                       |           |
|-------------------------------------------------------------------------------------------------------|-----------|
| <b>Introduction .....</b>                                                                             | <b>3</b>  |
| <b>Methods.....</b>                                                                                   | <b>3</b>  |
| <b>Comparison of Measured Values to a Healthy Population .....</b>                                    | <b>4</b>  |
| Global Lung Function Initiative Equations .....                                                       | 4         |
| Limits of Normal .....                                                                                | 5         |
| <b>Bronchodilator Responsiveness Testing.....</b>                                                     | <b>5</b>  |
| Expressing the Results of a Bronchodilator Responsiveness Test .....                                  | 6         |
| <b>Natural changes in Lung Function over time.....</b>                                                | <b>6</b>  |
| Considerations in children .....                                                                      | 7         |
| Considerations in adults.....                                                                         | 7         |
| <b>Severity of Lung Function Reduction .....</b>                                                      | <b>8</b>  |
| <b>Classification of Physiologic Impairments by Pulmonary Function Tests.....</b>                     | <b>8</b>  |
| <b>Ventilatory Impairments Defined by Spirometry.....</b>                                             | <b>9</b>  |
| Airflow impairment and Airflow Obstruction .....                                                      | 9         |
| Dysanapsis and Other Patterns of Abnormality in FEV <sub>1</sub> , FVC and FEV <sub>1</sub> /FVC..... | 9         |
| The “Non-Specific” Pattern: A Low FEV <sub>1</sub> and FVC, with Normal FEV <sub>1</sub> /FVC .....   | 9         |
| Central and Upper Airway Obstruction.....                                                             | 10        |
| <b>Ventilatory Impairments Defined by Lung Volume Measurements .....</b>                              | <b>10</b> |
| Restrictive Impairments .....                                                                         | 10        |
| Obstructive Impairments .....                                                                         | 10        |
| Mixed Abnormalities .....                                                                             | 10        |
| <b>Gas Transfer Impairments Defined by D<sub>L</sub>CO .....</b>                                      | <b>10</b> |
| <b>The Future of Pulmonary Function Test Interpretation .....</b>                                     | <b>11</b> |
| <b>Conclusion.....</b>                                                                                | <b>11</b> |
| <b>References.....</b>                                                                                | <b>20</b> |

## Introduction

Pulmonary function tests (PFTs) / Respiratory function tests reflect the physiological properties of the lungs (e.g., airflow mechanics, volumes, gas transfer). These tests have been used for decades to help diagnose lung disease, explain dyspnea, and monitor disease progression and treatment response. In addition, PFTs have been employed in population studies of the association between exposures and lung health. In 2005 the ATS/ERS Task Force on the Standardization of PFTs published a series of technical documents (1-4) and those for spirometry (5) and diffusing capacity ( $T_LCO$  or  $D_LCO$ ) (6) have recently been updated, and an update on lung volumes is forthcoming. This document is an update for the interpretation strategies of routine PFTs (3).

Appropriate interpretation of PFTs requires measurements that meet technical specification for test performance and quality (4-6). Lower quality tests must be interpreted with greater uncertainty as they may not reflect functional abnormalities. PFT interpretation also relies on clear reporting of results and the ATS standards for reporting PFTs are recommended (7).

Interpreting technically acceptable PFT results has three aspects:

- 1) Classification of observed values as within/outside the normal range with respect to a population of healthy individuals. This involves consideration of the measurement error of the test, the inherent biological variability of measurements between individuals, and between repeated measurements in the same individual;
- 2) Integrating knowledge of the physiologic determinants of test results into a functional classification of the identified impairments (e.g., obstructive, restrictive);
- 3) Integrating any identified patterns with other clinical data to describe a differential diagnosis that can guide therapy and estimate prognosis for an individual.

These are three distinct and complementary aspects of interpretation. This document addresses only the first two aspects. The final integration of pulmonary function results into a diagnosis or management plan is beyond the scope of this technical standard on physiological interpretation.

In this executive summary we highlight the key recommendations and supporting evidence from the Technical Standard document for PFT interpretation. A full exposition of these recommendations, rationale, and future work is presented in the complete statement.

## Methods

Task force members were selected by the ATS Proficiency Standards for Pulmonary Function Laboratories Committee, as well as ERS leadership. Conflicts of interest, including academic conflicts, were declared and vetted throughout the duration of the Task Force. Six of the 16 Task Force members are current or past members of the GLI Network Executive. A comprehensive literature search was conducted and available literature was used to inform the committee's discussions and recommendations. The reported standards were reached by consensus amongst the expert committee and apply to all settings globally (clinical interpretation, research studies,

tertiary, community and primary care). Consensus was reached after all Task Force members agreed on the final version.

## Comparison of Measured Values to a Healthy Population

***Global Lung Function Initiative (GLI) reference equations for spirometry (8), diffusing capacity (9) and lung volumes (10) should be used to define the expected range of values in healthy individuals.***

The range of values expected in a healthy population is expressed using reference equations derived from data collected from healthy individuals. Typically, height, age and sex are used to estimate expected lung function in health and account for the wide biological variability observed within and between populations. Differences in height and body proportions between populations (e.g. leg length versus trunk length) have been observed (11) and may account for some of the observed differences in lung function between populations. The reasons for observed differences in lung function between people around the world are multifactorial and not fully understood. The narrow definition of health may contribute to the observed differences, as ‘healthy’ individuals may include people exposed to risk factors for poor lung health during their lifetime. There are ongoing efforts to better understand the geographical, environmental, genetic and social determinants of health that play a role in explaining these observed differences. It is important that individuals have their lung function assessed against the appropriate reference population for that individual. The historical approach of fixed adjustment factors for race is not appropriate, introduces inaccuracies and is unequivocally discouraged. An individual’s medical history, symptoms, and social circumstances must be considered when applying PFT results to inform clinical decision making.

### Global Lung Function Initiative Equations

The Global Lung Function Initiative (GLI) reference equations are available for spirometry (8),  $D_LCO$  (9) and lung volumes (10), and facilitate standardized reporting and interpretation of pulmonary function measurements. These three GLI equations are internally consistent, providing a single suite of PFT equations. GLI  $D_LCO$  equations and GLI static lung volumes are currently based on measurements predominantly from individuals of European ancestry due to insufficient data from other populations.

Guidelines regarding the use of reference equations relating specific population groupings are currently under development, so these recommendations are based on the current evidence designed to increase the precision of determining whether the results are outside of the expected range for an individual. There is no single reference equation equally applicable to all populations. There is a trade-off between applying references equations that are specific to population groupings versus a single standard for all. Different approaches may be warranted in different contexts. Therefore, at this time we recommend employing the appropriate GLI spirometry equations based on self-reported ancestral origins if known, should be used as a way to standardize lung function measurements for sex, age and height. If ancestral origins are unknown or uncertain, the GLI “other” equations which represent “a multi-ethnic population”

should be used. PFT reports and research publications must include the specific reference equation that is used.

## Limits of Normal

***The 5<sup>th</sup> and 95<sup>th</sup> percentile limits (-1.645 and +1.645 z-scores) of the healthy population can be used to identify individuals with unusually low or high results, respectively.***

A reference range represents the distribution of values that are expected in a healthy population and the lower limit of normal (LLN) represents a cut-off to define results that are outside the range of values typically observed in health. This approach is used for many clinical outcomes in medicine(12-14). The 5<sup>th</sup> percentile represents a trade-off between incorrectly classifying a low value in a healthy individual and missing a clinically significant reduction in lung function (i.e., increased sensitivity for less specificity). For tests that may be outside the normal range in either direction (e.g., lung volumes or  $D_LCO$ ), the potential for false positives increases to 10% but the probability in a given individual for which these tests are requested based on concerns for lung disease is lower because there is a higher likelihood (pretest probability) that lung function will be outside the normal range (15). The LLN does not necessarily indicate a pathophysiological abnormality, nor is it a clinically meaningful threshold to diagnose disease. It provides an indication of whether the observed result can be expected in otherwise healthy individuals of similar age, sex and height. A result within the expected range for a subject does not exclude the presence of a disease process impairing function. For example, a drop from the 95<sup>th</sup> percentile to the 10<sup>th</sup> percentile is a very significant change but still leaves lung function within normal limits.

The widely used cut-offs of 80% predicted for  $FEV_1$  ( $\% \text{ predicted} = \text{Observed} \times 100 / \text{Predicted}$ ) and the 0.70 cut-off for  $FEV_1/FVC$  are not recommended. Percent of predicted does not take into account the observed age-related changes in measurement variability (Summary Figure 1). These ‘rules of thumb’ only approximate the LLN in the mid-range of age, where screening or case-finding for obstructive disease is most likely to be conducted. The simplicity of these cut-offs has resulted in their use across the age spectrum leading to systematic misinterpretation of results, particularly for women, children and older adults (16, 17).

## Bronchodilator Responsiveness Testing

***Changes in  $FEV_1$  and FVC following bronchodilator responsiveness testing should be expressed as the percent change relative to the individual’s predicted value. A change >10% of the predicted value indicates a positive response (Box 1).***

Bronchodilator responsiveness (BDR) testing assesses the change in respiratory function in response to bronchodilator administration. The BDR result reflects the integrated physiological response of airway epithelium, nerves, mediators, and airway smooth muscle, along with structural and geometric factors that affect airflow in the conducting airways (3, 18-20).

## Expressing the Results of a Bronchodilator Responsiveness Test

The 2005 PFT interpretation standard recommended using a combination of absolute and relative change from baseline as evidence of BDR, namely >200 ml AND >12 % increase in FEV<sub>1</sub> and/or FVC (3). The major limitation to this approach is that the absolute and relative change in FEV<sub>1</sub> and FVC are inversely proportional to baseline lung function, and are associated with height, age and sex in both health and disease (18, 19, 21-23). These factors influence the accuracy of identifying an abnormal BDR (22) and the previous approach to define BDR is no longer recommended.

### Box 1: Determination of a bronchodilator response

$$\text{Bronchodilator Response} = \frac{(\text{Post-bronchodilator value (l)} - \text{Pre-bronchodilator value (l)}) * 100}{\text{Predicted value (l)}\#}$$

A change of >10% is considered a significant BDR response.

#Predicted value should be determined using the appropriate GLI spirometry equation.

For example: A 50-year-old male; 170 cm in height has a pre-bronchodilator FEV<sub>1</sub> of 2.0 liters and a post-bronchodilator FEV<sub>1</sub> of 2.4 liters. The predicted FEV<sub>1</sub> is 3.32 liter (GLI 2012 'other' equation).

$$\text{Bronchodilator Response} = \frac{(2.4-2.0)*100}{3.32} = 12.1\%$$

Therefore, their BDR is reported as an increase of 12.1% of their predicted FEV<sub>1</sub> and classified as a significant response.

We recommend reporting the change in FEV<sub>1</sub> or FVC as the increase relative to the predicted value (see Box 1) which minimizes sex and height difference in assessing BDR (18, 19, 22). Based on the current evidence we recommend a BDR be classified as a change of >10% relative to the individual's predicted value for FEV<sub>1</sub> or FVC (see Box 1 for example calculation). The recommended BDR threshold balances the available data and consistency across age groups. As there were limited data in children and young adults to inform recommendations; further evidence is needed to validate this approach in children.

## Natural changes in Lung Function over time

***There are limited data to support a single recommendation for interpreting PFT reproducibility. Two distinct approaches should be used to express natural changes in lung function: conditional change scores for children and FEV<sub>1</sub>Q for adults.***

The interpretation of a series of lung function measurements and identifying meaningful changes in lung function over time are often used to guide clinical decisions. Ideally an individual's pre-disease measure of lung function, or baseline should be used as a reference. Comparison with the

rate decline observed in a group of healthy individuals can help to determine if rate of decline is greater than what can be expected in health. The 2005 PFT interpretation statement recommended a meaningful change as one greater than the biological variability (and measurement error) of a test. Previous literature also suggested an absolute change in FEV<sub>1</sub> (e.g., 100 ml) or the relative change from a previous assessment (e.g., a 10% change in FEV<sub>1</sub> from baseline in healthy individuals) to indicate clinically meaningful changes. However, changes over time have been demonstrated to be dependent on age, sex, baseline lung function and disease severity, limiting the generalisability of these approaches (24, 25).

### Considerations in children

Lung function measurements in children are more variable than in adults. This is due to both the physiology of the chest wall muscles as well as cognitive development which may influence test quality and biological variability. We identified one recently published study that demonstrates conditional change scores can be used to identify changes in lung function greater than what can be expected in healthy children and young people (25) which adjusts for longitudinal changes in FEV<sub>1</sub> z-score and conditions on the initial FEV<sub>1</sub> value (see Box 2). This concept has yet to be validated, extended to adults, or applied to other lung function indices but may be a reasonable tool to facilitate interpretation

#### **Box 2: Calculation of a conditional change score**

The change score is defined as  $\frac{zFEV_{1t2} - (r * zFEV_{1t1})}{\sqrt{1 - r^2}}$  where zFEV<sub>1</sub> at t<sub>1</sub> and t<sub>2</sub> are the observed z-scores at the initial and second time point, and r is defined as  $0.642 - 0.04 * \text{time}(\text{years}) + 0.020 * \text{age}(\text{years})$  at t<sub>1</sub>. Changes within +/- 1.96 change scores are considered within the normal limits.

For example, a 14-year-old male (170 cm) with a lung function drop from -0.78 z-scores (90.6% predicted) to -1.60 z-scores (80.6% predicted) within 3 months (r=0.907) has a corresponding change score of -2.12 which is outside the limits of normal. The same drop over a period of 4 years (r = 0.769) corresponds to a change score -1.56, which is within the limits of normal variability.

### Considerations in adults

In occupational medicine, where repeated measurements are made annually (or further apart) a 15% threshold has been proposed as a change outside the biological variability of the test and considered clinically relevant (26). FEV<sub>1</sub>Q is the FEV<sub>1</sub> divided by the sex-specific 1<sup>st</sup> percentile values of the absolute FEV<sub>1</sub> values found in adults with abnormal lung function, 0.4 liter for women and 0.5 liter for men (27). Under normal circumstances one unit of FEV<sub>1</sub>Q is lost approximately every 18 years and about every 10 years in smokers (28) and the elderly (26, 29) (see Box 3). Over a short interval, or even annually the FEV<sub>1</sub>Q should remain stable. Changes in

the FEV<sub>1</sub>Q may indicate a precipitous change in lung function. This approach is recommended as an alternative approach to interpretation of serial measures in adults but is not appropriate for children and adolescents.

### **Box 3: Calculation of FEV<sub>1</sub>Q in adults**

FEV<sub>1</sub>Q is the observed FEV<sub>1</sub> in liters divided by the sex-specific first percentile of the FEV<sub>1</sub> distribution found in adult subjects with lung disease; these percentiles are 0.5 liters for males and 0.4 liters for females. The index approximates to the number of turnovers remaining of a lower survivable limit of FEV<sub>1</sub>.

For example, a 70-year-old woman with an FEV<sub>1</sub> of 0.9 liters would have an FEV<sub>1</sub>Q of 0.9/0.4 liter or 2.25. Values closer to 1 indicate a greater risk of death.

## **Severity of Lung Function Impairment**

*A three-level system to assess the severity of lung function impairment using z-score values should be used; z-score > -1.645 are normal, z-scores between -1.65 and -2.5 are mild, z-scores between -2.5 and -4 are moderate and z-scores < -4 are severe.*

The magnitude of lung function deviation from what is expected of healthy individuals, having accounted for age-dependent variability, can be used to determine the association with objective outcomes such as quality of life or mortality (30-34). As lung function impairment is a continuum, setting multiple fixed boundaries to define grades is in some sense artificial and may imply tiered differences that are unfounded. Furthermore, the severity of lung function impairment is not necessarily equivalent to disease severity which encompasses quality of life, functional impairment, imaging, etc.

The 2005 PFT interpretation statement recommended severity grading for airflow obstruction using percent of predicted FEV<sub>1</sub> with 5 levels using cut values of 70%, 60%, 50% and 35% (3). The use of percent of predicted does not give uniform gradation across age (17, 35) (Summary Figure 2). We do not recommend the use of percent predicted to assess severity or make definitive treatment decisions. To account for an individual's sex, height, age, and ethnic background the previous severity scale for airflow obstruction were adapted for z-scores with cut values of -2, -2.5, -3 and -4 (36).

## **Classification of Physiologic Impairments by Pulmonary Function Tests**

*The interpretation of PFTs should focus on values of airflow, lung volume and gas transfer measurements to recognize patterns of altered physiology. PFTs alone should not be used to diagnose a specific pathologic condition.*

PFT interpretations should be clear, concise and informative to help understand whether the observed result is normal, and, if not, what type of physiological impairment is likely involved. In addition, repeated assessment of PFTs is important to detect clinically meaningful deviations



from an individual's previous results. In this document we will review the interpretation of measurements made by spirometry, lung volumes, and  $D_LCO$  as they relate to underlying pathophysiology.

Routine PFTs address three functional properties of the lungs:

- 1) Airflow (measurements of inspiratory and expiratory airflow)
- 2) Lung volumes and capacities (gas volumes at both maximal inspiration and at maximal expiration – total lung capacity (TLC), residual volume (RV) and functional residual capacity (FRC))
- 3) Alveolar-capillary gas transfer (usually measured by single breath uptake of carbon monoxide (CO) over time), referred to as the diffusing capacity of the lung for CO ( $D_LCO$ ) or the transfer factor of the lungs for CO ( $T_LCO$ )

Abnormalities in these three functional properties are conventionally classified into obstructive ventilatory, restrictive ventilatory, and gas transfer limitations or impairments (Summary Table 1).

## Ventilatory Impairments Defined by Spirometry

### Airflow impairment and Airflow Obstruction

Recognizing the normal physiologic events involved in expiratory “airflow limitation” we use the term “airflow obstruction” to refer to pathological reduction in airflow from the lungs that leads to a reduced  $FEV_1/FVC$  ratio.

An obstructive ventilatory impairment is defined by  $FEV_1/FVC$  (or VC) below the LLN defined as the 5<sup>th</sup> percentile of a normal population (Summary Table 2). This spirometric definition is consistent with the 1991 ATS (37), and 2005 ATS/ERS (3) recommendations, but differs from the definition suggested by the Global Initiative for Chronic Obstructive Lung Disease (GOLD) and the ATS/ERS guidelines on COPD which use a fixed  $FEV_1/FVC$  value of 0.7 to define an obstructive ventilatory impairment (38, 39). This latter definition is not recommended.

### Dysanapsis and Other Patterns of Abnormality Impairments in $FEV_1$ , FVC and $FEV_1/FVC$

For healthy individuals, the meaning of a low  $FEV_1/FVC$  ratio accompanied by an  $FEV_1$  within the normal range is unclear. This pattern may be due to “dysanaptic” or unequal growth of the airways and lung parenchyma (40). While this pattern has been thought to be a normal physiologic variant (37), new data suggest that it may be associated with the propensity for obstructive lung disease (41, 42).

### The “Non-Specific” Pattern: A Low $FEV_1$ and FVC, with Normal $FEV_1/FVC$

The pattern of reduced FVC and/or  $FEV_1$ , normal  $FEV_1/FVC$ , and normal TLC, has been termed the “non-specific” pattern. We now know that this pattern can reflect a number of different

ventilatory impairments including reduced effort, a restrictive ventilatory impairment, or be an early consequence of small airway disease with air trapping and/or emphysema (43, 44). In current and former patients who smoke when TLC is not available, (typically in population based studies) the non-specific pattern has been labelled “preserved ratio-impaired spirometry” or “PRISm” which, in follow-up has been shown to be associated with both more typical restrictive or obstructive patterns (45-47). As with any pattern involving a low FVC, TLC should be measured to confirm restriction, as clinically indicated

### Central and Upper Airway Obstruction

Central airway obstruction and upper airway obstruction affects the airways outside lung parenchyma. These may occur in the intrathoracic airways (intrathoracic trachea and main bronchi) or extrathoracic airways (pharynx, larynx, and extrathoracic portion of the trachea). In their early stages these markedly reduce peak expiratory flow (PEF) with little or no decrease in FEV<sub>1</sub> and/or FVC.

### Ventilatory Impairments Defined by Lung Volume Measurements

#### Restrictive Impairments

A reduction in lung volumes defines a restrictive ventilatory impairment and is classically characterized by a reduction in TLC below the LLN (5<sup>th</sup> percentile)

Summary Table 4). Typically the FVC and FEV<sub>1</sub> are also reduced and a normal FEV<sub>1</sub>/FVC ratio indicates that only restriction is present.

### Obstructive Impairments

Obstructive ventilatory impairments are generally assessed with spirometric measurements of expiratory airflow. As noted above, however, there are specific lung volume patterns associated with airflow obstruction that generally reflect hyperinflation/air trapping (Table 4).

### Mixed Ventilatory Impairments

A mixed ventilatory impairment is characterized by the coexistence of obstruction and restriction and is present when both FEV<sub>1</sub>/FVC and TLC are below the LLN (5th percentile). Since FVC may be equally reduced in either obstruction or restriction, the presence of a restrictive component in an obstructed individual cannot be inferred from simple measurements of FEV<sub>1</sub> and FVC.

### Gas Transfer Impairments Defined by D<sub>L</sub>CO

Gas transfer is commonly assessed by measuring the uptake of carbon monoxide (as a surrogate for oxygen) by the lungs. The normal range for D<sub>L</sub>CO and VA should be based on the 5<sup>th</sup> centile and 95<sup>th</sup> percentile (9, 48). In the setting of a normal V<sub>A</sub>, K<sub>CO</sub> also has 5<sup>th</sup> and 95<sup>th</sup> percentile values. However, because K<sub>CO</sub> will rise in a non-linear fashion as lung volumes fall (smaller lung gas volumes mean more rapid CO concentration changes due to an increasingly higher surface area to volume ratio), this “normal” range for K<sub>CO</sub> progressively loses meaning as lung volumes decrease.

## The Future of Pulmonary Function Test Interpretation

In the era of precision medicine and novel prediction tools, more sophisticated diagnostic models should be developed to identify more accurately the early determinants of reduced lung function. The development of artificial intelligence (AI)/machine learning (ML) approaches to PFT interpretation is encouraged. AIML-based software has the potential to provide more accurate and standardized interpretations and serve as a powerful decision support tool to improve clinical practice (49, 50). AIML may also help to develop personalized, unbiased prediction of normal lung function.

## Conclusion

Interpreting PFTs must take into account a level of uncertainty relating to (i) how representative the obtained result was of the individual’s lung function at the time of testing, (ii) how the pre-test probability of disease may influence what is the appropriate threshold for that individual, and (iii) how valid the reference population against which the test is being judged is for the individual.

In the future it may also be reasonable to set clinical decision-making thresholds for a test based on clinical risk and observed clinical outcomes.. A more comprehensive approach than simply relying on whether results are within or outside the normal range is necessary for the appropriate interpretation of lung function when pre-screening for employment, for tracking the effects of exposure, for disability assessment, and for risk assessment for therapies potentially toxic to the lungs. Interpreting PFT results must always consider the inherent biological variability of the test and the uncertainty of the test result.

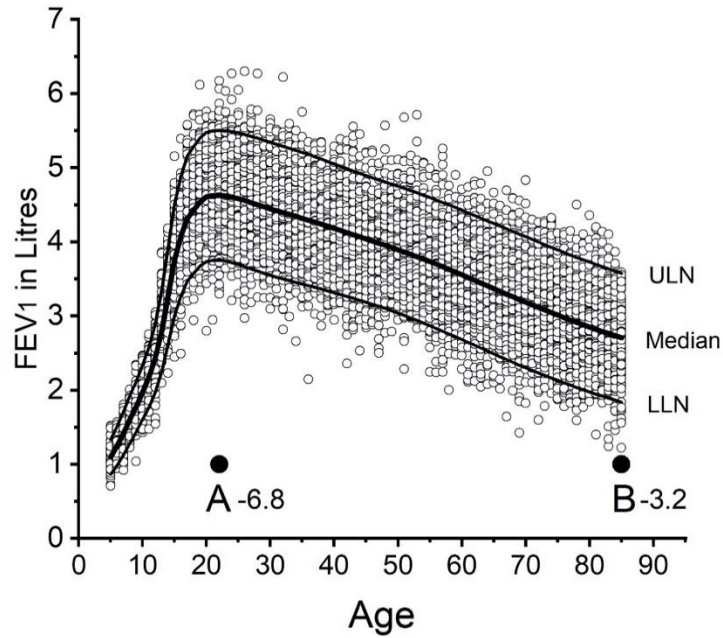

*Summary Figure 1.* Plot of population FEV<sub>1</sub> data for males of median height for age between ages 5 to 85 years with the upper limit of normal (ULN 95<sup>th</sup> percentile), lower limit of normal (LLN 5<sup>th</sup> percentile) and median predicted shown as solid lines derived from GLI spirometry equations (8). The LLN for a man aged 22 is at 81.1 % predicted but is 67.9 % predicted for a man of the same median height aged 85. Participants A and B both have an FEV<sub>1</sub> of 1.0 L giving a z-score of -6.8 for individual A and -3.2 for individual B.

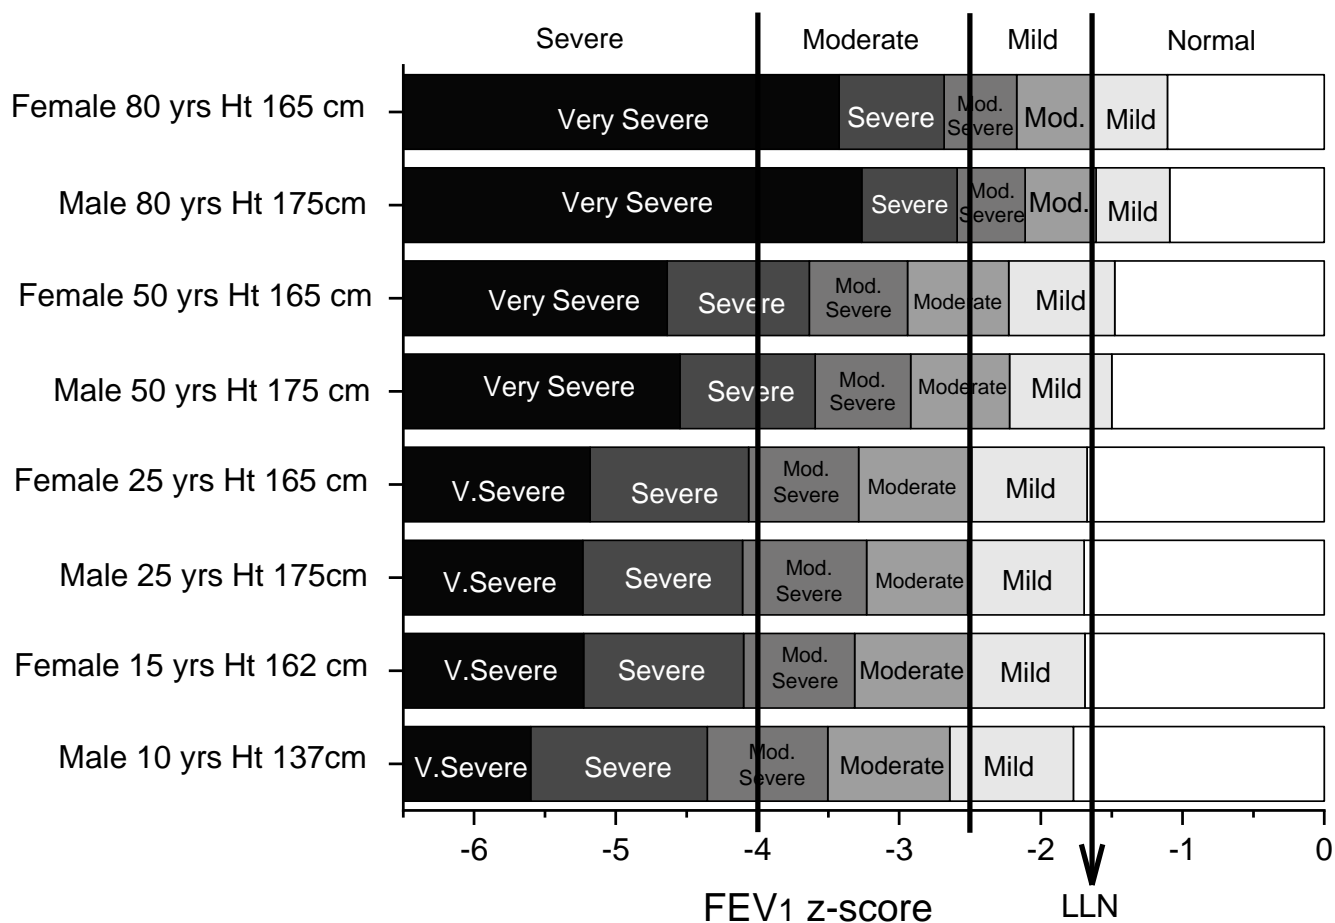

Summary Figure 2 A plot of the old ATS/ERS 2005 recommended thresholds for degree of lung function reduction of airflow obstruction using 70%, 60%, 50% and 35% of predicted FEV1 for eight individuals with the FEV<sub>1</sub> cut points expressed as z-score values on the abscissa scale. The lower limit of normal (LLN) at the 5<sup>th</sup> percentile (-1.645) is shown as a vertical arrow.

*Summary Table 1 Functional Classification of Common Impairments Assessed by Conventional PFTs and their Pathophysiological Determinants*

|                                             |                                                                                                                                                                                                                                                                                                                                                                                                                                                                                                                                                                         |
|---------------------------------------------|-------------------------------------------------------------------------------------------------------------------------------------------------------------------------------------------------------------------------------------------------------------------------------------------------------------------------------------------------------------------------------------------------------------------------------------------------------------------------------------------------------------------------------------------------------------------------|
| <b>Obstructive ventilatory impairments*</b> | Narrowing of the airways in the lung by physical obstruction or by dynamic airway collapsing. More proximal airway properties determine airflow resistance at large lung volumes and drive the FEV <sub>1</sub> /FVC measurement; more distal airway properties determine airflow resistance at small lung volumes and drive flow measurements later in a maximal exhalation. Because airway obstruction impairs lung emptying, it is often accompanied by air trapping and hyperinflation that may reduce the FVC but is more directly assessed by the RV measurement. |
| <b>Restrictive ventilatory impairments*</b> | Reduction in the size of the lungs. This may reflect lung parenchymal abnormalities or an inability to fully inhale due to extrapulmonary factors (e.g., weakness, chest wall abnormalities, obesity). Lung restriction reduces FEV <sub>1</sub> , FVC, (but not the FEV <sub>1</sub> /FVC ratio) and TLC.                                                                                                                                                                                                                                                              |
| <b>Gas transfer impairments</b>             | Reduction in transport of gas (carbon monoxide transfer as a surrogate for oxygen) between the alveolar spaces and alveolar capillary blood. This may be due to a reduction in alveolar surface area, abnormal alveolar-capillary membrane properties, or reduced pulmonary capillary blood (hemoglobin) volume.                                                                                                                                                                                                                                                        |

\* Many authorities also use the term “ventilatory impairments” to group obstructive and restrictive impairments.

*Summary Table 2 Classification of Ventilatory Impairments Defined by Spirometry. Reduced or elevated results are defined by the lower and upper limits of normal respectively.*

|                                  | <b>FEV<sub>1</sub></b> | <b>FVC</b> | <b>FEV<sub>1</sub>/FVC</b> | <b>Comments</b>                                                                                                                                                                                                                                                            |
|----------------------------------|------------------------|------------|----------------------------|----------------------------------------------------------------------------------------------------------------------------------------------------------------------------------------------------------------------------------------------------------------------------|
| <b>Obstructive impairments</b>   | Normal/↓               | Normal     | ↓                          |                                                                                                                                                                                                                                                                            |
| <b>Restrictive impairments</b>   | ↓                      | ↓          | Normal/↑                   | TLC reduced to confirm                                                                                                                                                                                                                                                     |
| <b>Non-specific pattern (51)</b> | ↓                      | ↓          | Normal                     | <p>TLC normal; additional testing may be helpful (e.g. bronchodilator response, Raw).</p> <p>When TLC is not available, this pattern has been described in population-based studies as preserved ratio-impaired spirometry (PRISm), in current and former smokers (45)</p> |
| <b>Muscle weakness</b>           | ↓                      | ↓          | Normal                     | Lack of sharp Peak Expiratory Flow                                                                                                                                                                                                                                         |
| <b>Suboptimal effort</b>         | ↓                      | ↓          | Normal                     | Lack of sharp Peak Expiratory Flow                                                                                                                                                                                                                                         |
| <b>Mixed disorder</b>            | ↓                      | ↓          | ↓                          | Need lung volumes to confirm                                                                                                                                                                                                                                               |
| <b>Dysanapsis(42)</b>            | Normal                 | Normal /↑  | ↓                          | May be normal variant                                                                                                                                                                                                                                                      |



Summary Table 3 Classification of Ventilatory Impairments Defined by Lung Volumes

|                            | <b>TLC</b> | <b>FRC</b> | <b>RV</b> | <b>FRC/TLC</b> | <b>RV/TLC</b> | <b>Comments</b>                                                                                                                                                                                                             |
|----------------------------|------------|------------|-----------|----------------|---------------|-----------------------------------------------------------------------------------------------------------------------------------------------------------------------------------------------------------------------------|
| <b>Large lungs</b>         | ↑          | ↑          | ↑         | Normal         | Normal        | Normal variant above ULN                                                                                                                                                                                                    |
| <b>Obstruction</b>         | Normal /↑  | Normal /↑  | ↑         | Normal /↑      | ↑             | Hyperinflation if FRC/TLC or RV/TLC elevated; gas trapping if only RV/TLC elevated (e.g., COPD)                                                                                                                             |
| <b>Simple Restriction</b>  | ↓          | ↓          | ↓         | Normal         | Normal        | e.g., ILD                                                                                                                                                                                                                   |
| <b>Complex Restriction</b> | ↓          | ↓          | Normal /↑ | Normal         | ↑             | When the FEV <sub>1</sub> /FVC is normal complex refers to the process contributing to restrictive process that disproportionately reduces FVC relative to TLC. (e.g., small airway disease with gas trapping and obesity). |
| <b>Mixed Disorder</b>      | ↓          | Normal /↓  | Normal /↑ | Normal /↑      | Normal /↑     | Typically, FEV <sub>1</sub> /FVC is reduced (e.g., combined ILD and COPD)                                                                                                                                                   |
| <b>Muscle weakness</b>     | ↓          | Normal/↓   | ↑         | ↑              | ↑             | When effort appears sufficient                                                                                                                                                                                              |
| <b>Suboptimal effort</b>   | ↓          | Normal     | ↑         | ↑              | ↑             | Especially when effort appears insufficient                                                                                                                                                                                 |
| <b>Obesity</b>             | Normal /↓  | ↓          | Normal /↑ | Normal /↓      | Normal /↑     | ERV low; reduced TLC at very high BMI (>40)                                                                                                                                                                                 |

Summary Table 4 Summary of Types of Spirometrically defined and Lung Volume Defined Ventilatory Impairments.

| <b>Ventilatory Impairments</b> | <b>Patterns</b>                                                                                                                                                                                                                                                                                                                                                                                                                                                                                                                                       |
|--------------------------------|-------------------------------------------------------------------------------------------------------------------------------------------------------------------------------------------------------------------------------------------------------------------------------------------------------------------------------------------------------------------------------------------------------------------------------------------------------------------------------------------------------------------------------------------------------|
| <b>Obstruction</b>             | <ul style="list-style-type: none"> <li>• <math>FEV_1/FVC &lt; 5^{\text{th}}</math> percentile.</li> <li>• Decrease in flow at low lung volume may reflect small airway disease in individuals.</li> <li>• Concomitant decrease in <math>FEV_1</math> and FVC most commonly due to poor effort but may reflect airflow obstruction. Recommend lung volumes.</li> <li>• Measurement of absolute lung volumes may assist in diagnosis and assessment of hyperinflation.</li> <li>• Measurement of airflow resistance may assist in diagnosis.</li> </ul> |
| <b>Restriction</b>             | <ul style="list-style-type: none"> <li>• <math>TLC &lt; 5^{\text{th}}</math> percentile</li> <li>• Reduced FVC does not prove restrictive impairment but may be suggestive of restriction when <math>FEV_1/FVC</math> is normal or increased.</li> <li>• Low TLC from single breath test not reliable, especially with low <math>FEV_1/FVC</math>.</li> <li>• A normal FVC usually excludes restriction</li> </ul>                                                                                                                                    |
| <b>Mixed</b>                   | <ul style="list-style-type: none"> <li>• <math>FEV_1/FVC</math> and <math>TLC</math> both <math>&lt; 5^{\text{th}}</math> percentile.</li> </ul>                                                                                                                                                                                                                                                                                                                                                                                                      |

Summary Table 5. Summary of differences between the 2005 and 2021 Interpretation Standards.

| 2005 ATS/ERS Statement                                                                                                                                                                                                                                                                                                                                                                                                                                        | 2021 ATS/ERS Technical Standard                                                                                                                                                                                                                                                                                                                     |
|---------------------------------------------------------------------------------------------------------------------------------------------------------------------------------------------------------------------------------------------------------------------------------------------------------------------------------------------------------------------------------------------------------------------------------------------------------------|-----------------------------------------------------------------------------------------------------------------------------------------------------------------------------------------------------------------------------------------------------------------------------------------------------------------------------------------------------|
| <u>General comments:</u> <ul style="list-style-type: none"> <li>Using PFT interpretation to aid in clinical diagnosis and decision making</li> </ul>                                                                                                                                                                                                                                                                                                          | <u>General comments:</u> <ul style="list-style-type: none"> <li>More emphasis on using PFTs to classify physiology, not make a clinical diagnosis</li> <li>Emphasis on uncertainty of interpretation, especially near LLN</li> </ul>                                                                                                                |
| <u>Reference Equations</u> <ul style="list-style-type: none"> <li>Use of race/ethnic specific equations preferred over using adjustment factors</li> <li>Spirometry: <ul style="list-style-type: none"> <li>In USA: NHANES 3 recommended</li> <li>In Europe: no specific equations recommended</li> </ul> </li> <li>Lung Volumes and DLCO: <ul style="list-style-type: none"> <li>In USA and Europe: no specific equations recommended</li> </ul> </li> </ul> | <u>Reference Equations:</u> <ul style="list-style-type: none"> <li>Recommendation to use GLI reference equations for spirometry, lung volumes and DLCO</li> <li>More emphasis on incomplete understanding of role of race/ethnicity on lung function</li> <li>Clarify that biological sex, not gender be used to interpret lung function</li> </ul> |
| <u>Defining Normal Range</u> <ul style="list-style-type: none"> <li>General use of LLN = 5<sup>th</sup> percentile</li> <li>Use of fixed ratio FEV<sub>1</sub>/FVC &lt; 0.7 not recommended</li> <li>Use of 80% predicted to define normal not recommended</li> </ul>                                                                                                                                                                                         | <u>Defining Normal Range</u> <ul style="list-style-type: none"> <li>General use of LLN = 5<sup>th</sup> percentile and ULN = 95<sup>th</sup> percentile</li> <li>Use of fixed ratio FEV<sub>1</sub>/FVC &lt; 0.7 not recommended</li> <li>Use of 80% predicted to define normal not recommended</li> </ul>                                          |
| <u>Bronchodilator Response</u> <ul style="list-style-type: none"> <li>&gt;12% and 200 ml in FEV<sub>1</sub> or FVC from baseline</li> <li>4 doses of 100 mcg salbutamol; wait 15 minutes</li> </ul>                                                                                                                                                                                                                                                           | <u>Bronchodilator Response</u> <ul style="list-style-type: none"> <li>&gt;10% of predicted value in FEV<sub>1</sub> or FVC</li> <li>Choice of protocol for administering bronchodilator not specified</li> </ul>                                                                                                                                    |
| <u>Interpretation of Change Over Time</u> <ul style="list-style-type: none"> <li>Variable changes over time depending on normal vs. COPD and time period (within a day, week to week, year to year)</li> </ul>                                                                                                                                                                                                                                                | <u>Interpretation of Change Over Time</u> <ul style="list-style-type: none"> <li>Conditional change score in children</li> <li>FEV1Q in adults</li> </ul>                                                                                                                                                                                           |
| <u>Severity of Lung Function Impairment</u> <ul style="list-style-type: none"> <li>Using FEV<sub>1</sub> (includes obstruction or restriction): <ul style="list-style-type: none"> <li>Mild = FEV<sub>1</sub> &gt; 70% predicted</li> <li>Mod = 60-69% predicted</li> <li>Mod-Severe = 50-59% predicted</li> <li>Severe = 35-49% predicted</li> <li>Very severe = &lt; 35% predicted</li> </ul> </li> <li>DLCO:</li> </ul>                                    | <u>Severity of Lung Function Impairment</u> <ul style="list-style-type: none"> <li>For all measures use z-score: <ul style="list-style-type: none"> <li>Mild = -1.65 to -2.5</li> <li>Mod = -2.51 to -4.0</li> <li>Severe = &gt; -4</li> </ul> </li> </ul>                                                                                          |

|                                                                                                                                                                                                                                                                                                                                                                                                                                                                                                                                                                                                                                                                                                                                                       |                                                                                                                                                                                                                                                                                                                                                                                                                                                                                                                                                                                                                                                                                                                                   |
|-------------------------------------------------------------------------------------------------------------------------------------------------------------------------------------------------------------------------------------------------------------------------------------------------------------------------------------------------------------------------------------------------------------------------------------------------------------------------------------------------------------------------------------------------------------------------------------------------------------------------------------------------------------------------------------------------------------------------------------------------------|-----------------------------------------------------------------------------------------------------------------------------------------------------------------------------------------------------------------------------------------------------------------------------------------------------------------------------------------------------------------------------------------------------------------------------------------------------------------------------------------------------------------------------------------------------------------------------------------------------------------------------------------------------------------------------------------------------------------------------------|
| <ul style="list-style-type: none"> <li>○ Mild = &gt;60% predicted and &lt; LLN</li> <li>○ Mod = 40-60% predicted</li> <li>○ Severe = &lt; 40% predicted</li> </ul>                                                                                                                                                                                                                                                                                                                                                                                                                                                                                                                                                                                    |                                                                                                                                                                                                                                                                                                                                                                                                                                                                                                                                                                                                                                                                                                                                   |
| <u>Classification of Physiological Impairments</u> <ul style="list-style-type: none"> <li>● Airflow obstruction: <math>FEV_1/FVC &lt; 5^{th}</math> percentile, using largest VC; lung volumes to detect hyperinflation or air trapping; elevated airway resistance; central/upper airway obstruction</li> <li>● Restriction: <ul style="list-style-type: none"> <li>○ <math>TLC &lt; 5^{th}</math> percentile and normal <math>FEV_1/VC</math></li> <li>○ Mixed = <math>FEV_1/VC</math> and <math>TLC &lt; 5^{th}</math> percentile</li> </ul> </li> <li>● Gas Transfer Impairment: <ul style="list-style-type: none"> <li>○ <math>D_LCO, KCO &lt; 5^{th}</math> percentile</li> <li>○ Importance of adjustments for Hb, COHb</li> </ul> </li> </ul> | <u>Classification of Physiological Impairments</u> <ul style="list-style-type: none"> <li>● Airflow obstruction: <math>FEV_1/FVC &lt; 5^{th}</math> percentile, using FVC; lung volumes to detect hyperinflation or air trapping; dysanapsis; non-specific pattern and PRISm; central/upper airway obstruction</li> <li>● Restriction: <ul style="list-style-type: none"> <li>○ <math>TLC &lt; 5^{th}</math> percentile</li> <li>○ Simple vs. complex restriction</li> <li>○ Hyperinflation</li> <li>○ Mixed</li> </ul> </li> <li>● Gas Transfer Impairment <ul style="list-style-type: none"> <li>○ <math>D_LCO &lt; 5^{th}</math> percentile</li> <li>○ Using VA, KCO to classify low <math>D_LCO</math></li> </ul> </li> </ul> |

## References

1. Nourse ES. The regional workshops on primary care. *J Med Educ* 1975; 50: 201-209.
2. Grega DS, Sherman RG. Responsiveness of neurogenic hearts to octopamine. *Comp Biochem Physiol C Comp Pharmacol* 1975; 52: 5-8.
3. Pellegrino R, Viegi G, Brusasco V, Crapo RO, Burgos F, Casaburi R, Coates A, van der Grinten CP, Gustafsson P, Hankinson J, Jensen R, Johnson DC, MacIntyre N, McKay R, Miller MR, Navajas D, Pedersen OF, Wanger J. Interpretative strategies for lung function tests. *Eur Respir J* 2005; 26: 948-968.
4. Hudson JI, Giacalone JJ. Current issues in primary care education: review and commentary. *J Med Educ* 1975; 50: 211-233.
5. Graham BL, Steenbruggen I, Miller MR, Barjaktarevic IZ, Cooper BG, Hall GL, Hallstrand TS, Kaminsky DA, McCarthy K, McCormack MC, Oropez CE, Rosenfeld M, Stanojevic S, Swanney MP, Thompson BR. Standardization of Spirometry 2019 Update. An Official American Thoracic Society and European Respiratory Society Technical Statement. *Am J Respir Crit Care Med* 2019; 200: e70-e88.
6. Graham BL, Brusasco V, Burgos F, Cooper BG, Jensen R, Kendrick A, R MacIntyre NR, Thompson BR, Wanger J. ERS/ATS Standards for single-breath carbon monoxide uptake in the lung. *European Respiratory Journal* 2016.
7. Culver BH, Graham BL, Coates AL, Wanger J, Berry CE, Clarke PK, Hallstrand TS, Hankinson JL, Kaminsky DA, MacIntyre NR, McCormack MC, Rosenfeld M, Stanojevic S, Weiner DJ. Recommendations for a Standardized Pulmonary Function Report. An Official American Thoracic Society Technical Statement. *Am J Respir Crit Care Med* 2017; 196: 1463-1472.
8. Quanjer PH, Stanojevic S, Cole TJ, Baur X, Hall GL, Culver BH, Enright PL, Hankinson JL, Ip MS, Zheng J, Stocks J, Initiative ERSGLF. Multi-ethnic reference values for spirometry for the 3-95-yr age range: the global lung function 2012 equations. *Eur Respir J* 2012; 40: 1324-1343.
9. Stanojevic S, Graham BL, Cooper BG, Thompson BR, Carter KW, Francis RW, Hall GL. Official ERS technical standards: Global Lung Function Initiative reference values for the carbon monoxide transfer factor for Caucasians. *Eur Respir J* 2017; 50: 1700010.
10. Hall GL, Filipow N, Ruppel G, Okitika T, Thompson BR, Kirkby J, Steenbruggen I, Cooper BG, Stanojevic S. Official ERS technical standard: Global Lung Function Initiative reference values for static lung volumes in individuals of European ancestry. *European Respiratory Journal* 2020; 57: 2000289.
11. Pomeroy E, Stock JT, Wells JCK. Population history and ecology, in addition to climate, influence human stature and body proportions. *Sci Rep* 2021; 11: 274.
12. The theory of reference values. Part 6. Presentation of observed values related to reference values. International Federation of Clinical Chemistry, Scientific Committee, Clinical Section, Expert Panel on Theory of Reference Values (EPTRV). *Clin Chim Acta* 1983; 127: 441F-448F.
13. National High Blood Pressure Education Program Working Group on High Blood Pressure in C, Adolescents. The fourth report on the diagnosis, evaluation, and treatment of high blood pressure in children and adolescents. *Pediatrics* 2004; 114: 555-576.
14. Kuczmarski R, Ogden CL, Guo S, Grummer-Strawn L, Flegal KM, Mei Z, Wei R, Curtin LR,

- Roche AF. CDC Growth Charts: National Center for Health Statistics; 2000.
15. Neder JA, Berton DC, O'Donnell DE. The Lung Function Laboratory to Assist Clinical Decision-making in Pulmonology: Evolving Challenges to an Old Issue. *Chest* 2020; 158: 1629-1643.
  16. Miller MR, Quanjer PH, Swanney MP, Ruppel G, Enright PL. Interpreting lung function data using 80% predicted and fixed thresholds misclassifies more than 20% of patients. *Chest* 2011; 139: 52-59.
  17. Ali SS, Elliott WH. Bile acids. XLVII. 12 $\alpha$ -Hydroxylation of precursors of allo bile acids by rabbit liver microsomes. *Biochimica et biophysica acta* 1975; 409: 249-257.
  18. Quanjer PH, Ruppel GL, Langhammer A, Krishna A, Mertens F, Johannessen A, Menezes AMB, Wehrmeister FC, Perez-Padilla R, Swanney MP, Tan WC, Bourbeau J. Bronchodilator Response in FVC Is Larger and More Relevant Than in FEV1 in Severe Airflow Obstruction. *Chest* 2017; 151: 1088-1098.
  19. Brand PL, Quanjer PH, Postma DS, Kerstjens HA, Koeter GH, Dekhuijzen PN, Sluiter HJ. Interpretation of bronchodilator response in patients with obstructive airways disease. The Dutch Chronic Non-Specific Lung Disease (CNSLD) Study Group. *Thorax* 1992; 47: 429-436.
  20. Chhabra SK. Acute bronchodilator response has limited value in differentiating bronchial asthma from COPD. *J Asthma* 2005; 42: 367-372.
  21. Koga T, Kamimura T, Oshita Y, Narita Y, Mukaino T, Nishimura M, Mizoguchi Y, Aizawa H. Determinants of bronchodilator responsiveness in patients with controlled asthma. *J Asthma* 2006; 43: 71-74.
  22. Tan WC, Vollmer WM, Lamprecht B, Mannino DM, Jithoo A, Nizankowska-Mogilnicka E, Mejza F, Gislason T, Burney PG, Buist AS, Group BCR. Worldwide patterns of bronchodilator responsiveness: results from the Burden of Obstructive Lung Disease study. *Thorax* 2012; 67: 718-726.
  23. Ward H, Cooper BG, Miller MR. Improved criterion for assessing lung function reversibility. *Chest* 2015; 148: 877-886.
  24. Wang ML, Avashia BH, Petsonk EL. Interpreting periodic lung function tests in individuals: the relationship between 1- to 5-year and long-term FEV1 changes. *Chest* 2006; 130: 493-499.
  25. Stanojevic S, Filipow N, Ratjen F. Paediatric reproducibility limits for the forced expiratory volume in 1 s. *Thorax* 2020; 75: 891-896.
  26. Xu X, Weiss ST, Dockery DW, Schouten JP, Rijcken B. Comparing FEV1 in adults in two community-based studies. *Chest* 1995; 108: 656-662.
  27. Miller MR, Pedersen OF. New concepts for expressing forced expiratory volume in 1 s arising from survival analysis. *Eur Respir J* 2010; 35: 873-882.
  28. Lange P, Parner J, Vestbo J, Schnohr P, Jensen G. A 15-year follow-up study of ventilatory function in adults with asthma. *N Engl J Med* 1998; 339: 1194-1200.
  29. Luoto J, Pihlsgard M, Wollmer P, Elmstahl S. Relative and absolute lung function change in a general population aged 60-102 years. *Eur Respir J* 2019; 53.
  30. Kannel WB, Lew EA, Hubert HB, Castelli WP. The value of measuring vital capacity for prognostic purposes. *Trans Assoc Life Insur Med Dir Am* 1980; 64: 66-83.
  31. Peto R, Speizer FE, Cochrane AL, Moore F, Fletcher CM, Tinker CM, Higgins IT, Gray RG,

- Richards SM, Gilliland J, Norman-Smith B. The relevance in adults of air-flow obstruction, but not of mucus hypersecretion, to mortality from chronic lung disease. Results from 20 years of prospective observation. *Am Rev Respir Dis* 1983; 128: 491-500.
32. Ferguson MK, Little L, Rizzo L, Popovich KJ, Glonek GF, Leff A, Manjoney D, Little AG. Diffusing capacity predicts morbidity and mortality after pulmonary resection. *J Thorac Cardiovasc Surg* 1988; 96: 894-900.
  33. Kannel WB, Hubert H, Lew EA. Vital capacity as a predictor of cardiovascular disease: the Framingham study. *Am Heart J* 1983; 105: 311-315.
  34. Neas LM, Schwartz J. Pulmonary function levels as predictors of mortality in a national sample of US adults. *Am J Epidemiol* 1998; 147: 1011-1018.
  35. Stanojevic S, Wade A, Stocks J, Hankinson J, Coates AL, Pan H, Rosenthal M, Corey M, Lebecque P, Cole TJ. Reference ranges for spirometry across all ages: a new approach. *Am J Respir Crit Care Med* 2008; 177: 253-260.
  36. Quanjer PH, Pretto JJ, Brazzale DJ, Boros PW. Grading the severity of airways obstruction: new wine in new bottles. *Eur Respir J* 2014; 43: 505-512.
  37. Lung function testing: selection of reference values and interpretative strategies. American Thoracic Society. *Am Rev Respir Dis* 1991; 144: 1202-1218.
  38. Singh D, Agusti A, Anzueto A, Barnes PJ, Bourbeau J, Celli BR, Criner GJ, Frith P, Halpin DMG, Han M, Lopez Varela MV, Martinez F, Montes de Oca M, Papi A, Pavord ID, Roche N, Sin DD, Stockley R, Vestbo J, Wedzicha JA, Vogelmeier C. Global Strategy for the Diagnosis, Management, and Prevention of Chronic Obstructive Lung Disease: the GOLD science committee report 2019. *Eur Respir J* 2019; 53.
  39. Qaseem A, Wilt TJ, Weinberger SE, Hanania NA, Criner G, van der Molen T, Marciniuk DD, Denberg T, Schunemann H, Wedzicha W, MacDonald R, Shekelle P. Diagnosis and management of stable chronic obstructive pulmonary disease: a clinical practice guideline update from the American College of Physicians, American College of Chest Physicians, American Thoracic Society, and European Respiratory Society. *Ann Intern Med* 2011; 155: 179-191.
  40. Hyatt RE. Forced exhalation. In: Macklem PT, Mead J, editors. *Handbook of Physiology The Respiratory System Mechanics of Breathing Section 3*. Bethesda, MD: American Physiological Society; 1986. p. 295-314.
  41. Forno E, Weiner DJ, Mullen J, Sawicki G, Kurland G, Han YY, Cloutier MM, Canino G, Weiss ST, Litonjua AA, Celedon JC. Obesity and Airway Dysanapsis in Children with and without Asthma. *Am J Respir Crit Care Med* 2017; 195: 314-323.
  42. Thompson BR. Dysanapsis-Once Believed to be a Physiological Curiosity-Is Now Clinically Important. *Am J Respir Crit Care Med* 2017; 195: 277-278.
  43. Wan ES, Castaldi PJ, Cho MH, Hokanson JE, Regan EA, Make BJ, Beaty TH, Han MK, Curtis JL, Curran-Everett D, Lynch DA, DeMeo DL, Crapo JD, Silverman EK, Investigators CO. Epidemiology, genetics, and subtyping of preserved ratio impaired spirometry (PRISm) in COPDGene. *Respir Res* 2014; 15: 89.
  44. Wan ES, Fortis S, Regan EA, Hokanson J, Han MK, Casaburi R, Make BJ, Crapo JD, DeMeo DL, Silverman EK, Investigators CO. Longitudinal Phenotypes and Mortality in Preserved Ratio Impaired Spirometry in the COPDGene Study. *Am J Respir Crit Care Med* 2018; 198: 1397-1405.

45. Wan ES, Fortis S, Regan EA, Hokanson J, Han MK, Casaburi R, Make BJ, Crapo JD, DeMeo DL, Silverman EK. Longitudinal Phenotypes and Mortality in Preserved Ratio Impaired Spirometry in the COPDGene Study. *Am J Respir Crit Care Med* 2018; 198: 1397-1405.
46. Fortis S, Comellas A, Kim V, Casaburi R, Hokanson JE, Crapo JD, Silverman EK, Wan ES. Low FVC/TLC in Preserved Ratio Impaired Spirometry (PRISm) is associated with features of and progression to obstructive lung disease. *Sci Rep* 2020; 10: 5169.
47. Marott JL, Ingebrigtsen TS, Colak Y, Vestbo J, Lange P. Trajectory of Preserved Ratio Impaired Spirometry: Natural History and Long-Term Prognosis. *Am J Respir Crit Care Med* 2021; 204: 910-920.
48. Graham BL, Brusasco V, Burgos F, Cooper BG, Jensen R, Kendrick A, MacIntyre NR, Thompson BR, Wanger J. 2017 ERS/ATS standards for single-breath carbon monoxide uptake in the lung. *Eur Respir J* 2017; 49.
49. Topalovic M, Das N, Burgel PR, Daenen M, Derom E, Haenebalcke C, Janssen R, Kerstjens HAM, Liistro G, Louis R, Ninane V, Pison C, Schlessers M, Vercauter P, Vogelmeier CF, Wouters E, Wynants J, Janssens W. Artificial intelligence outperforms pulmonologists in the interpretation of pulmonary function tests. *Eur Respir J* 2019; 53: 1801660.
50. Das N, Verstraete K, Stanojevic S, Topalovic M, Aerts JM, Janssens W. Deep-learning algorithm helps to standardise ATS/ERS spirometric acceptability and usability criteria. *Eur Respir J* 2020; 56: 2000603.
51. Hyatt RE, Cowl CT, Bjoraker JA, Scanlon PD. Conditions associated with an abnormal nonspecific pattern of pulmonary function tests. *Chest* 2009; 135: 419-424.
