# Supplementary material
Source: HighWire-hosted journal article supplement (https://erj.ersjournals.com/content/60/1/2101499)
Supplement: inline-supplementary-material-2 [file inline-supplementary-material-2.pdf]

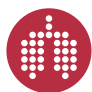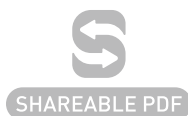

# ERS/ATS technical standard on interpretive strategies for routine lung function tests

Sanja Stanojevic<sup>1</sup>, David A. Kaminsky<sup>2</sup>, Martin R. Miller<sup>3</sup>, Bruce Thompson<sup>4</sup>, Andrea Aliverti<sup>5</sup>, Igor Barjaktarevic<sup>6</sup>, Brendan G. Cooper<sup>7</sup>, Bruce Culver<sup>8</sup>, Eric Derom<sup>9</sup>, Graham L. Hall<sup>10</sup>, Teal S. Hallstrand<sup>8</sup>, Joerg D. Leuppi<sup>11,12</sup>, Neil MacIntyre<sup>13</sup>, Meredith McCormack<sup>14</sup>, Margaret Rosenfeld<sup>15</sup> and Erik R. Swenson<sup>8,16</sup>

<sup>1</sup>Dept of Community Health and Epidemiology, Dalhousie University, Halifax, NS, Canada. <sup>2</sup>Pulmonary Disease and Critical Care Medicine, University of Vermont Larner College of Medicine, Burlington, VT, USA. <sup>3</sup>Institute of Applied Health Research, University of Birmingham, Birmingham, UK. <sup>4</sup>Physiology Service, Dept of Respiratory Medicine, The Alfred Hospital and School of Health Sciences, Swinburne University of Technology, Melbourne, Australia. <sup>5</sup>Dept of Electronics, Information and Bioengineering (DEIB), Politecnico di Milano, Milan, Italy. <sup>6</sup>Division of Pulmonary and Critical Care Medicine, University of California, Los Angeles, CA, USA. <sup>7</sup>Lung Function and Sleep, Queen Elizabeth Hospital, University Hospitals Birmingham NHS Foundation Trust, Birmingham, UK. <sup>8</sup>Dept of Medicine, Division of Pulmonary, Critical Care and Sleep Medicine, University of Washington, Seattle, WA, USA. <sup>9</sup>Dept of Respiratory Medicine, Ghent University, Ghent, Belgium. <sup>10</sup>Children's Lung Health, Wal-yan Respiratory Research Centre, Telethon Kids Institute and School of Allied Health, Faculty of Health Science, Curtin University, Bentley, Australia. <sup>11</sup>University Clinic of Medicine, Cantonal Hospital Basel, Liestal, Switzerland. <sup>12</sup>University Clinic of Medicine, University of Basel, Basel, Switzerland. <sup>13</sup>Division of Pulmonary, Allergy, and Critical Care Medicine, Dept of Medicine, Duke University Medical Center, Durham, NC, USA. <sup>14</sup>Pulmonary Function Laboratory, Pulmonary and Critical Care Medicine, Johns Hopkins University, Baltimore, MD, USA. <sup>15</sup>Seattle Children's Hospital, Seattle, WA, USA. <sup>16</sup>VA Puget Sound Health Care System, Seattle, WA, USA.

Corresponding author: Sanja Stanojevic ([sanja.stanojevic@dal.ca](mailto:sanja.stanojevic@dal.ca))

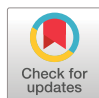

Shareable abstract (@ERSpublications)

**Data from pulmonary function tests must be complemented with clinical expertise and consideration of the inherent biological variability and uncertainty of the test result to ensure appropriate interpretation of an individual's lung function measurements** <https://bit.ly/3ecluFc>

**Cite this article as:** Stanojevic S, Kaminsky DA, Miller MR, *et al.* ERS/ATS technical standard on interpretive strategies for routine lung function tests. *Eur Respir J* 2022; 60: 2101499 [DOI: 10.1183/13993003.01499-2021].

This single-page version can be shared freely online.

The content of this work is not subject to copyright. Design and branding are copyright ©ERS 2022. For reproduction rights and permissions contact [permissions@ersnet.org](mailto:permissions@ersnet.org)

This article has an editorial commentary:  
<https://doi.org/10.1183/13993003.00317-2022>

Received: 26 May 2021  
Accepted: 18 Nov 2021

## Abstract

**Background** Appropriate interpretation of pulmonary function tests (PFTs) involves the classification of observed values as within/outside the normal range based on a reference population of healthy individuals, integrating knowledge of physiological determinants of test results into functional classifications and integrating patterns with other clinical data to estimate prognosis. In 2005, the American Thoracic Society (ATS) and European Respiratory Society (ERS) jointly adopted technical standards for the interpretation of PFTs. We aimed to update the 2005 recommendations and incorporate evidence from recent literature to establish new standards for PFT interpretation.

**Methods** This technical standards document was developed by an international joint Task Force, appointed by the ERS/ATS with multidisciplinary expertise in conducting and interpreting PFTs and developing international standards. A comprehensive literature review was conducted and published evidence was reviewed.

**Results** Recommendations for the choice of reference equations and limits of normal of the healthy population to identify individuals with unusually low or high results are discussed. Interpretation strategies for bronchodilator responsiveness testing, limits of natural changes over time and severity are also updated. Interpretation of measurements made by spirometry, lung volumes and gas transfer are described as they relate to underlying pathophysiology with updated classification protocols of common impairments.

**Conclusions** Interpretation of PFTs must be complemented with clinical expertise and consideration of the inherent biological variability of the test and the uncertainty of the test result to ensure appropriate interpretation of an individual's lung function measurements.
